# Supplementary material for: Twenty-Five Years of Propagation in Suspension Cell Culture Results in Substantial Alterations of the Arabidopsis Thaliana Genome
Source: MDPI journal article supplement (doi:10.3390/genes10090671), 2019-09-02

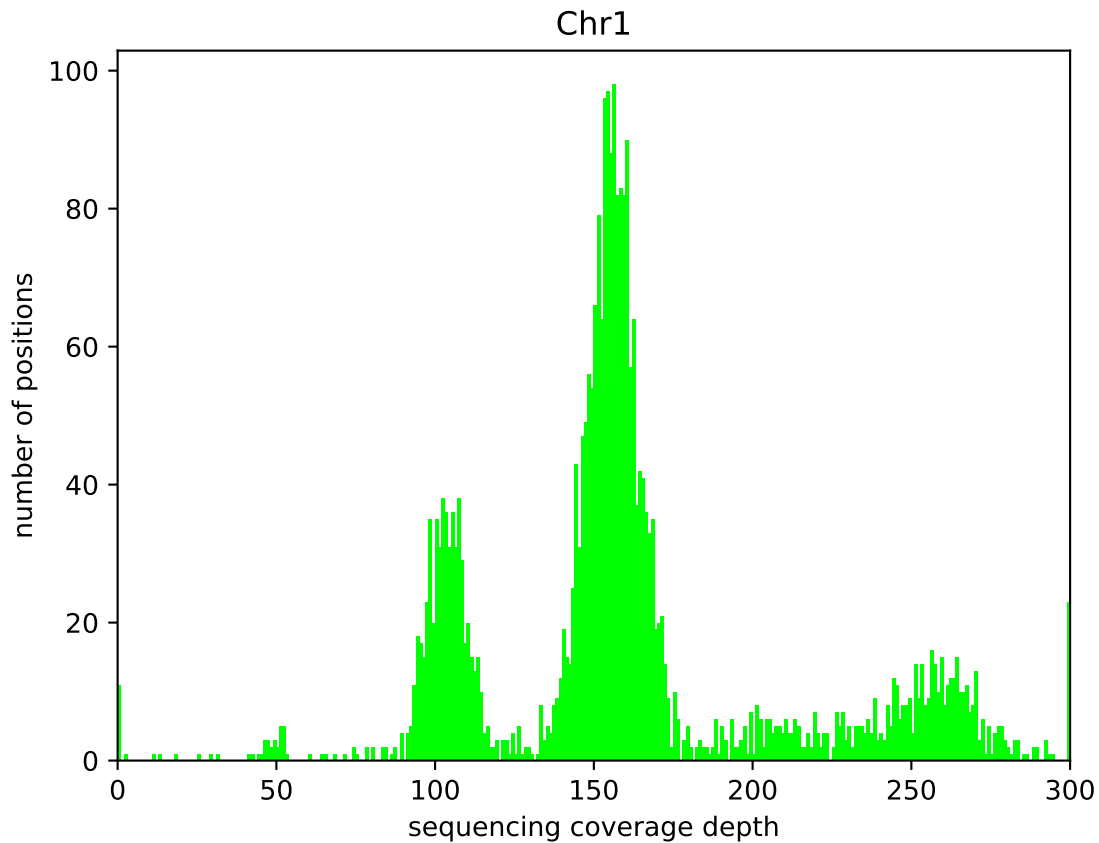

Chr2

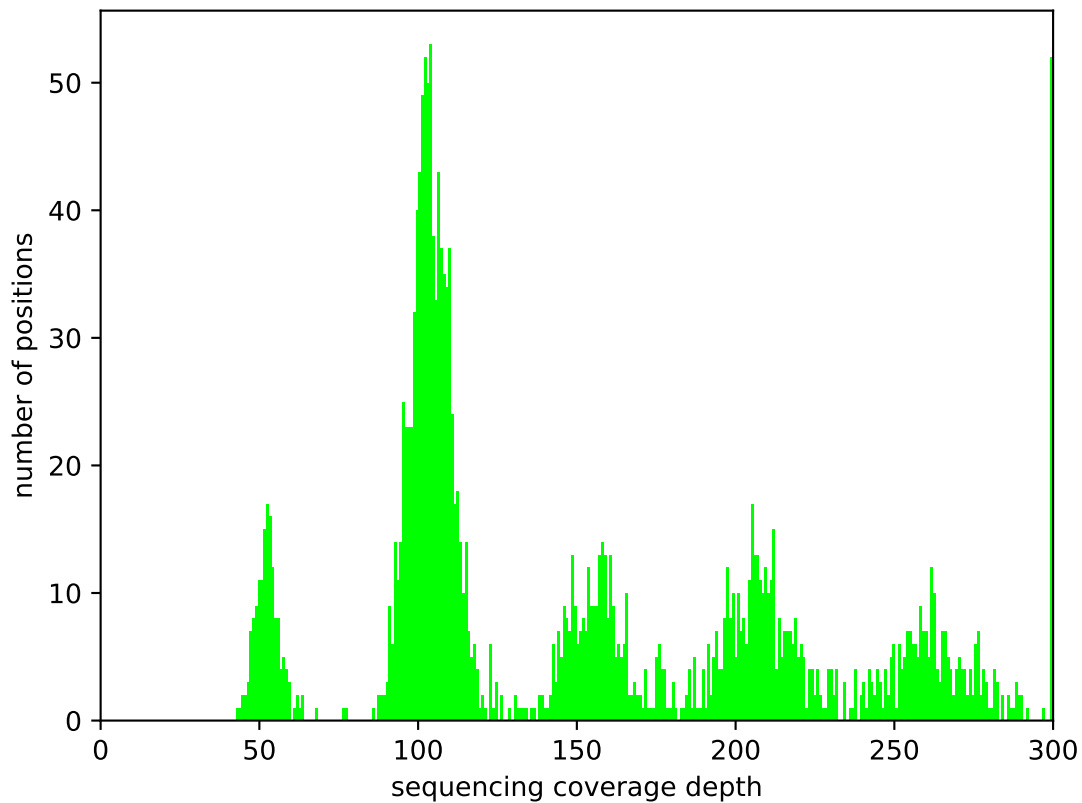

Chr3

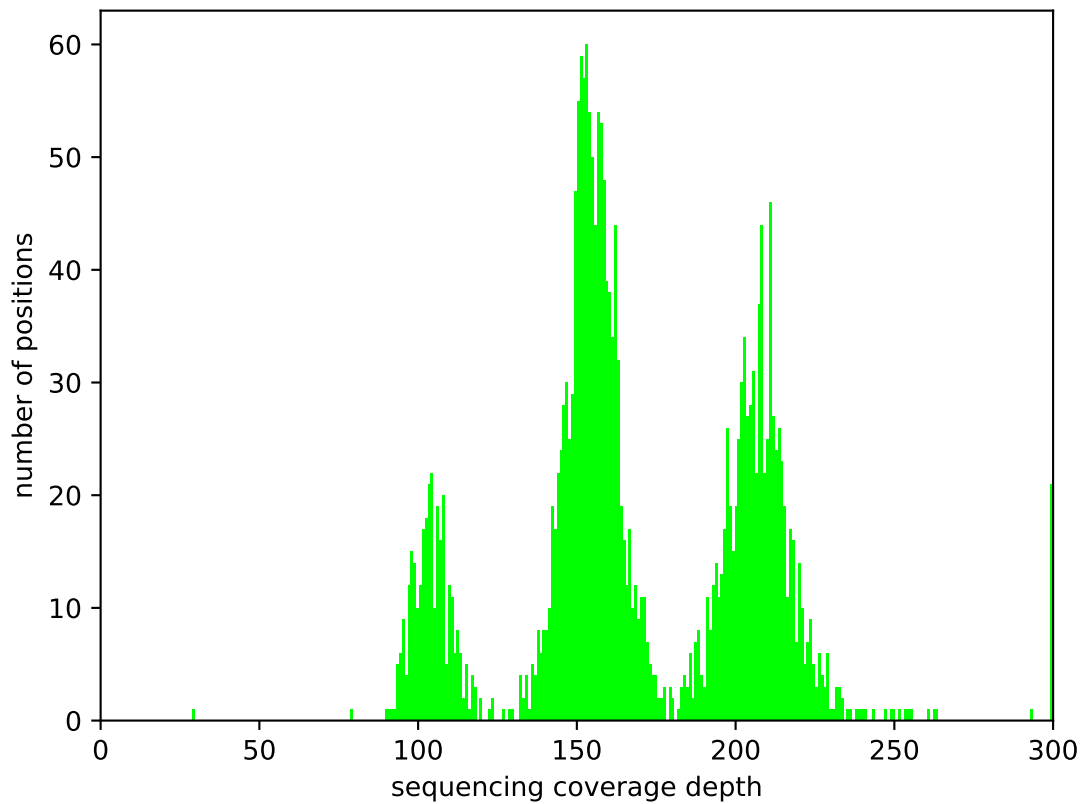

Chr4

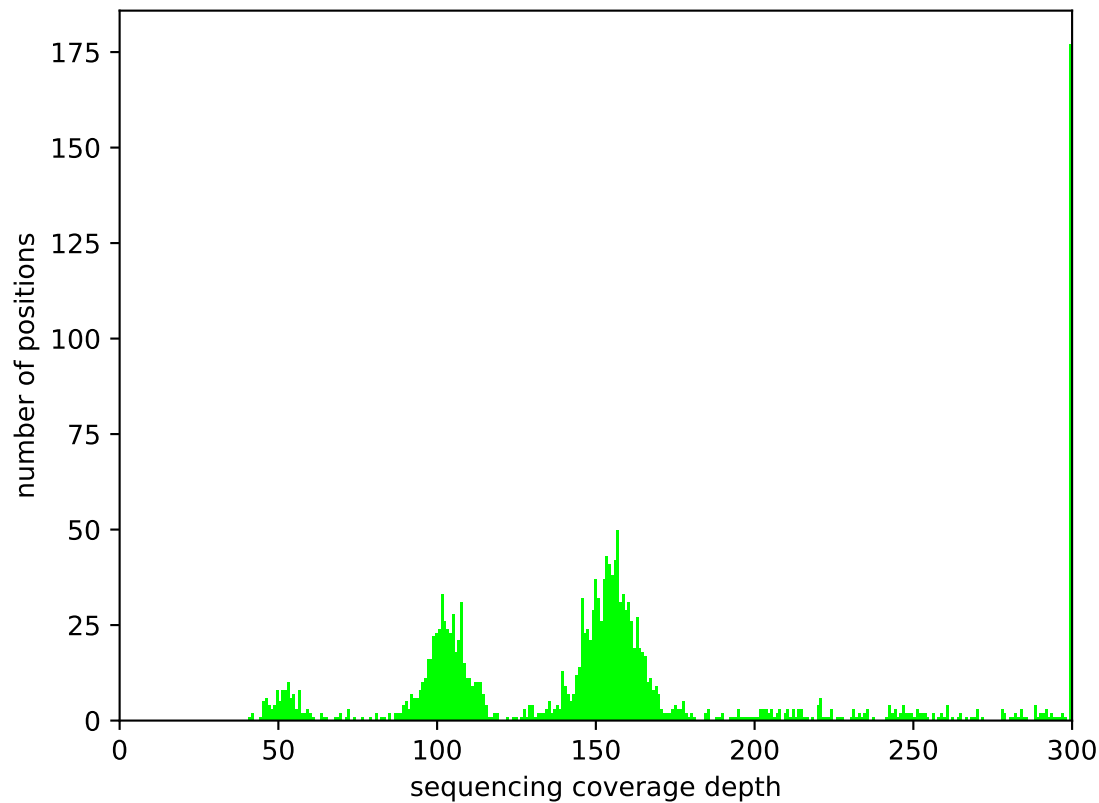

# Chr5

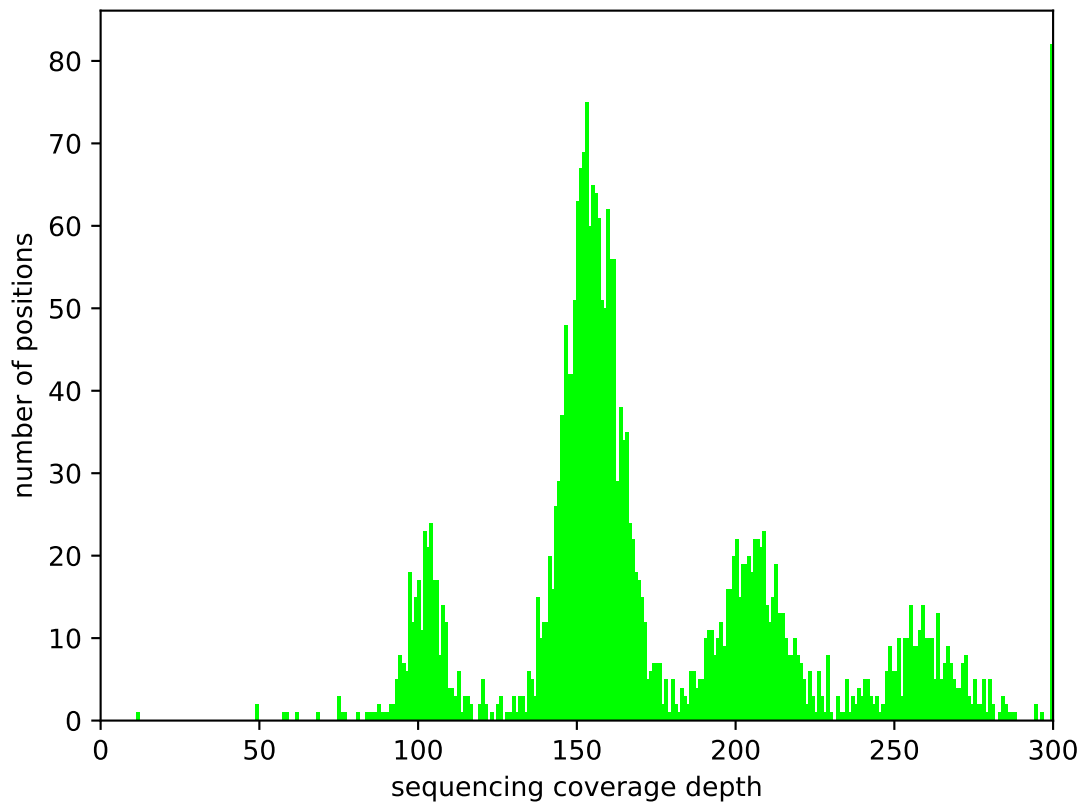

Supplement: s1 [file s1]
